# Supplementary material for: Pianno: a probabilistic framework automating semantic annotation for spatial transcriptomics
Source: PubMed Central journal article supplement (PMC11271244; doi:10.1038/s41467-024-47152-4), 2024-04-02
Supplement: 41467_2024_47152_MOESM3_ESM.pdf [file 41467_2024_47152_MOESM3_ESM.pdf]

## **Description of Additional Supplementary Files:**

**Supplementary Data 1:** presents the evaluation scores for all the methods used on the dIPFC dataset.

**Supplementary Data 2:** provides a list of the top 100 differentially expressed genes within clusters from the human dIPFC sample 151671.

**Supplementary Data 3:** provides a list of Gene Ontology (GO) terms enriched in cluster A-11 within the dIPFC sample 151671.

**Supplementary Data 4:** provides a list of the top 100 differentially expressed genes within clusters from the human M1C dataset.
